# Supplementary material for: Hierarchical nanosheet-assembled yolk–shell TiO2microspheres with improved photocatalytic activity
Source: Royal Society of Chemistry journal article supplement (doi:10.1039/c6ce00578k), 2016-01-01
Supplement: c6ce00578k1.pdf [file c6ce00578k1.pdf]

## Electronic Supplementary Information for

### Hierarchical nanosheet assembled yolk-shell TiO<sub>2</sub> microspheres with improved photocatalytic activity

Lu-Lu Lai<sup>a</sup>, Wei Wen<sup>b</sup> and Jin-Ming Wu<sup>\*a</sup>

<sup>a</sup> State Key Laboratory of Silicon Materials, and School of Materials Science and Engineering, Zhejiang University, Hangzhou, 310037, P. R. China

<sup>b</sup> College of Mechanical and Electrical Engineering, Hainan University, Haikou, 580228, P. R. China

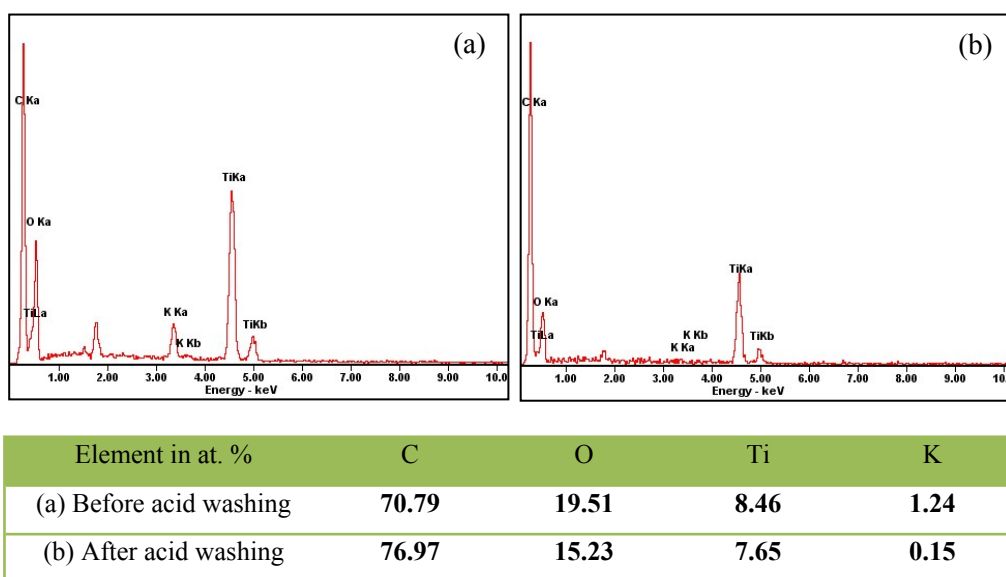

**Fig. S1** EDS analysis results of the as-collected yolk-shell products (a) before and (b) after the acid washing procedure. Note the effective removal of K by the acid washing.

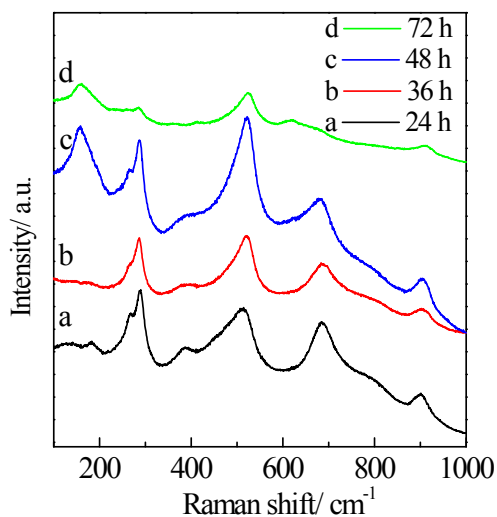

**Fig. S2** Raman spectra of microspheres achieved at various reaction durations. The powders here were subjected to a subsequent acid washing, but not calcinated.

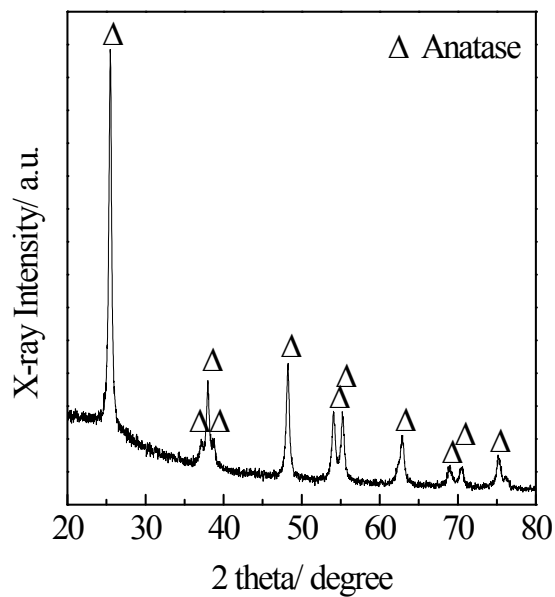

**Fig. S3** XRD pattern of urchin-like TiO<sub>2</sub> microspheres achieved with a reaction duration of 36 h. The microspheres were achieved by the subsequent acid washing and calcination in air at 450 °C for 1 h.

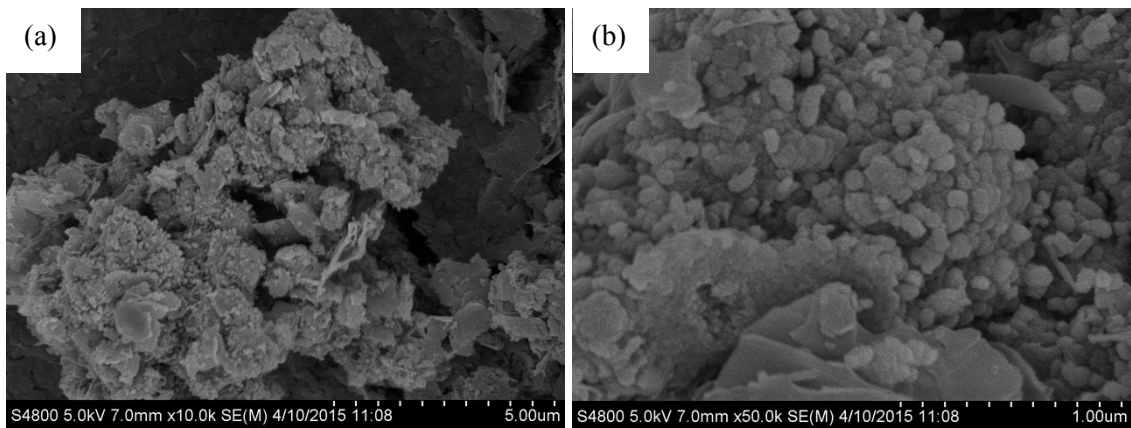

**Fig. S4** Low (a) and high (b) magnification FESEM images of the precipitates collected after the hydrolysis of  $\text{K}_2\text{TiO}(\text{C}_2\text{O}_4)_2$  in the mixed solutions of  $\text{H}_2\text{O}_2$  and  $\text{HNO}_3$  at  $80^\circ\text{C}$ .

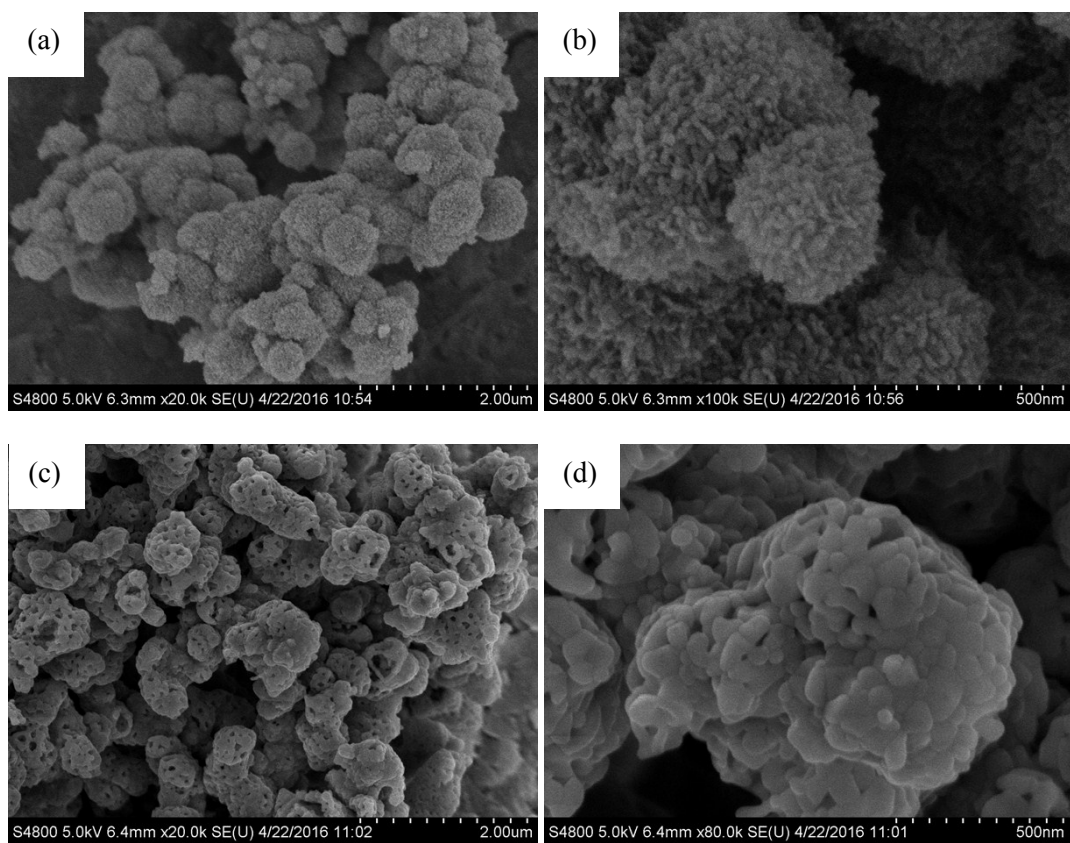

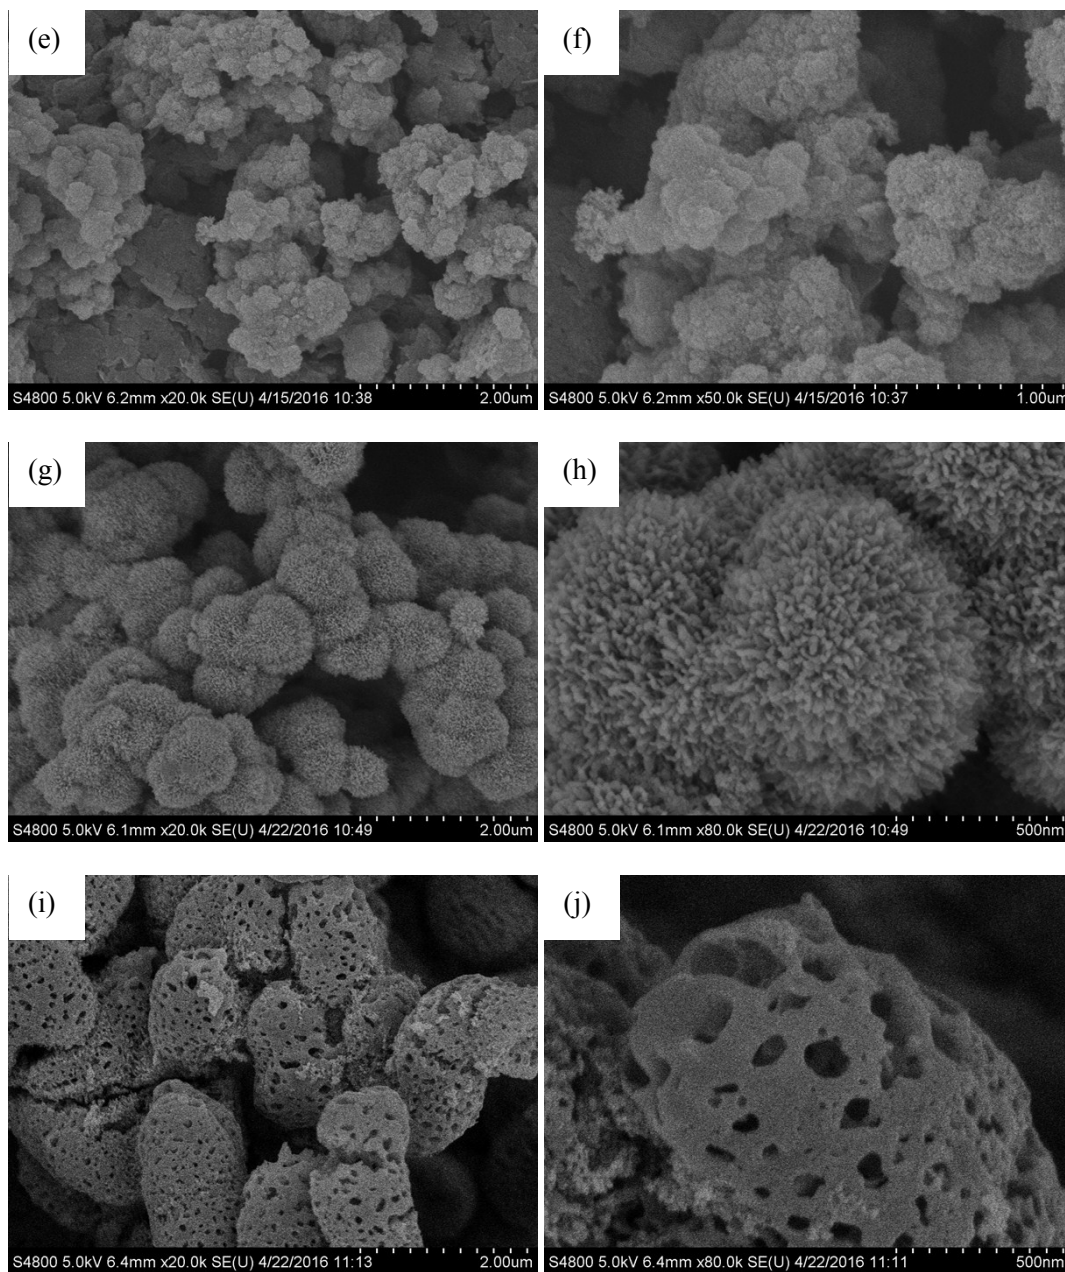

**Fig. S5** FESEM images of the powders derived with varied chemicals in the reactants. The varied parameter was noted in the citation, with other parameters remained the same as the reactant utilized for the synthesis of the yolk-shell microspheres (10 %  $\text{H}_2\text{O}_2$ , 0.87 M  $\text{HNO}_3$  and 500 mM  $\text{K}_2\text{TiO}(\text{C}_2\text{O}_4)_2$ ). (a, b) 20 wt. %  $\text{H}_2\text{O}_2$ ; (c, d) 30 wt. %  $\text{H}_2\text{O}_2$ ; (e, f) 0 mL  $\text{HNO}_3$ ; (g, h) 1.74 M  $\text{HNO}_3$ ; (i, j) 200 mM  $\text{K}_2\text{TiO}(\text{C}_2\text{O}_4)_2$ . The powders were subjected to the intermediate acid washing and subsequent calcination in air at 450 °C for 1 h.

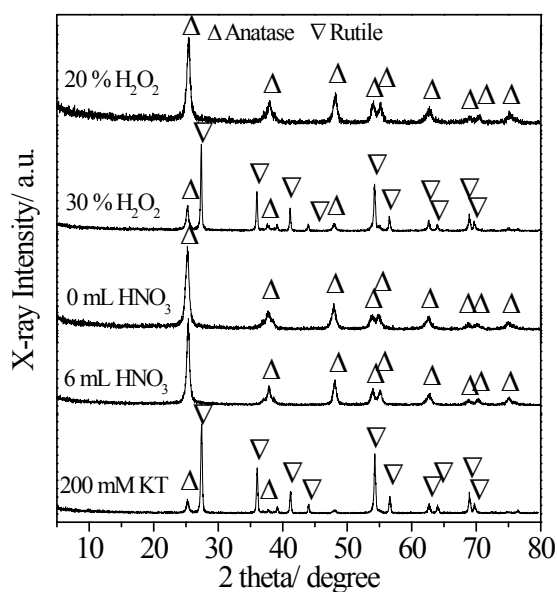

**Fig. S6** XRD patterns of the powders as illustrated in Fig. S5.

Parallel experiments intending to clarify the effects of reactants, that is, the concentrations of  $\text{H}_2\text{O}_2$ ,  $\text{HNO}_3$ , and  $\text{K}_2\text{TiO}(\text{C}_2\text{O}_4)_2$ , were carried out. The collected precipitates were subjected to the intermediate acid washing and calcination in air at  $450^\circ\text{C}$  for 1 h. Fig. S5 and S6 show, respectively, the SEM images and XRD patterns of the achieved powders.

For the  $\text{H}_2\text{O}_2$  concentration, a value below 10 wt. % achieved few precipitates. With increasing concentrations to 20 wt. % and 30 wt. %, the morphology changed to urchin-like microspheres consisted of short nanorods (Fig. S5a, b), and then to hollow microspheres consisted of nanoparticulate aggregates with interconnected nanopores (Fig. S5c, d).

For the  $\text{HNO}_3$  concentration, the urchin-like microspheres consisted of nanorods were also achieved when the  $\text{HNO}_3$  additive was doubled (Fig. S5e, f). In absence of the  $\text{HNO}_3$  in the reactants, only solid nanoparticulate aggregates can be observed, which can be contributed to the higher hydrolysis and condensation rate arising from the improved pH value.

For the  $\text{K}_2\text{TiO}(\text{C}_2\text{O}_4)_2$  concentration, hollow microspheres consisted of nanoparticulate aggregates with interconnected nanopores were achieved when decreasing the concentration to 200 mM (Fig. S5g, h), which is similar to that achieved by using 30 wt. %  $\text{H}_2\text{O}_2$  (Fig. S5c, d).

The XRD analysis results show that, after the acid washing and calcination, hollow microspheres consisted of nanoparticulate aggregates with interconnected nanopores mainly consisted of rutile, with minor anatase; whilst other powders are phase pure anatase (Fig. S6).

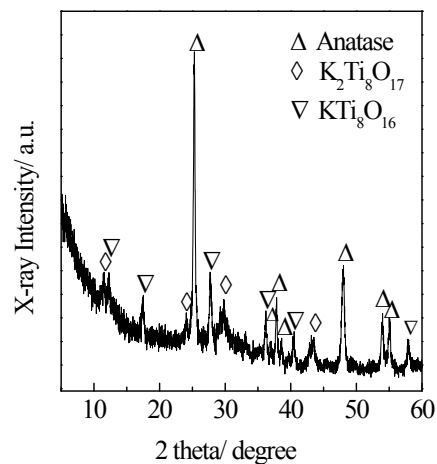

**Fig. S7** XRD patterns of the yolk-shell powders after calcinations at 450 °C for 1 h in air. Note that the acid washing procedure was not performed here.

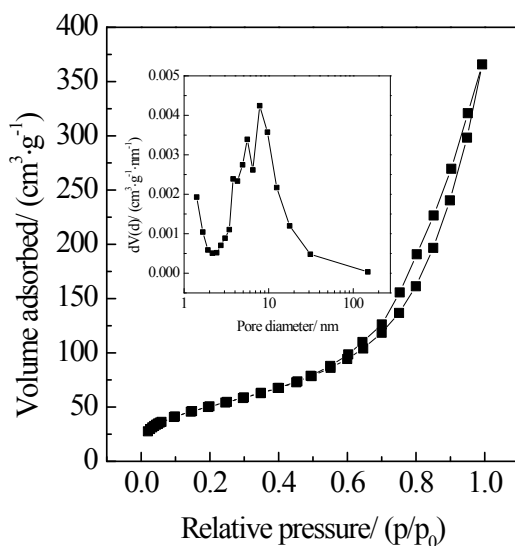

**Fig. S8** The N<sub>2</sub> adsorption-desorption isotherm of the urchin-like TiO<sub>2</sub> microspheres (NS-36h). The inset shows the corresponding pore size distribution curve.

The specific surface area of the urchin-like TiO<sub>2</sub> microspheres (NS-36h) is determined to be 186.8 m<sup>2</sup>·g<sup>-1</sup>. The pore volume is ca. 0.566 cm<sup>3</sup>·g<sup>-1</sup>.

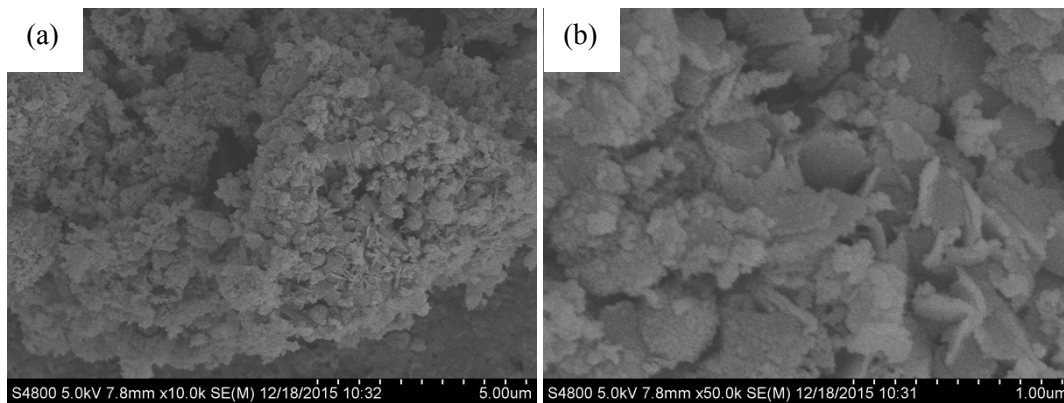

**Fig. S9** Low (a) and high (b) magnification FESEM images of hierarchical nanosheet-assembled yolk-shell  $\text{TiO}_2$  microspheres after being crushed.

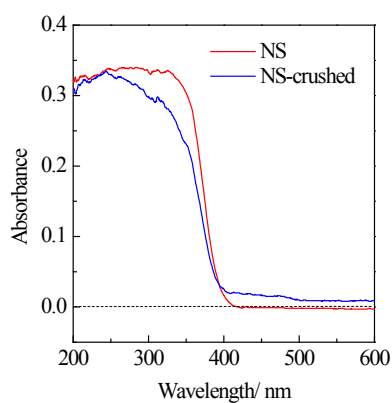

**Fig. S10** Diffuse reflectance UV-Vis spectra of hierarchical nanosheet assembled yolk-shell  $\text{TiO}_2$  microspheres before (NS) and after being crushed (NS-crushed).

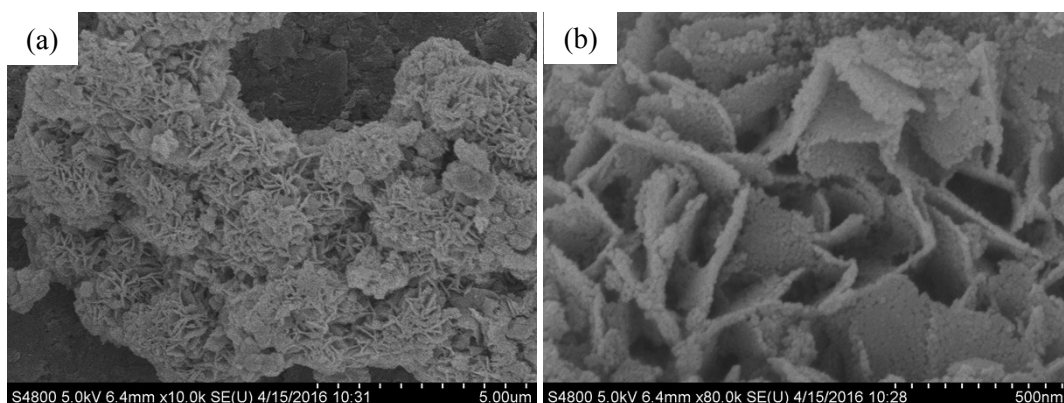

**Fig. S11** Low (a) and high (b) magnification FESEM images of hierarchical nanosheet-assembled yolk-shell  $\text{TiO}_2$  microspheres after cycling test.
